# Supplementary material for: CYP19 Genetic Polymorphism Haplotype AASA Is Associated with a Poor Prognosis in Premenopausal Women with Lymph Node-Negative, Hormone Receptor-Positive Breast Cancer
Source: PubMed Central journal article supplement (PMC3845431; doi:10.1155/2013/562197), 2013-11-14
Supplement: 562197.f1.pdf [file 562197.f1.pdf]

Supplemental Table 1. Allelic frequency of CYP19 in Hapmap or NCBI

| Marker              | CEU <sup>a</sup> | CHB <sup>b</sup> |
|---------------------|------------------|------------------|
| Allelic frequency   |                  |                  |
| rs4646 C/A          | 0.77/0.23        | 0.70/0.30        |
| rs1065779 C/A       | 0.58/0.42        | 0.53/ 0.47       |
| rs1870050 A/C       | 0.91/0.09        | 0.77/0.23        |
| (TTTA) <sub>n</sub> | 0.63/0.37        | 0.75/0.25        |

NCBI: National Center for Biotechnology Information

<sup>a</sup>CEU: Utah residents with Northern and Western European ancestry from the CEPH collection

<sup>b</sup>CHB: Han Chinese in Beijing, China
